# Supplementary material
Source: PubMed Central journal article supplement (PMC9198004)
Supplement: NIHMS1782500-supplement-1.pdf [file NIHMS1782500-supplement-1.pdf]

## APPENDICES

Microsimulation model calibration with approximate Bayesian computation in R: A tutorial

eTable 1 Model Parameters Prior to Calibration

| Coefficient               | Transition to Nursing Home Model | Transition Out of Nursing Home Model |
|---------------------------|----------------------------------|--------------------------------------|
| Intercept                 | -10.320                          | -0.110                               |
| Age at Diagnosis          | 0.024                            | -0.010                               |
| Gender (ref = Female)     | -0.193                           | -0.175                               |
| Race: Black (ref = White) | -0.590                           | 0.047                                |
| Race: Other (ref = White) | -0.519                           | 0.027                                |
| Shape                     | 1.796                            | 0.523                                |

eTable 2 ABC Rejection Sampler and ABC MCMC Posterior for Single Dimensional Example

| Tolerance ( $\epsilon$ ) | Posterior Predictive Mean [90% Credible Interval] |
|--------------------------|---------------------------------------------------|
| 0.005                    | 0.488 [0.484, 0.492]                              |
| 0.01                     | 0.488 [0.479, 0.497]                              |
| 0.025                    | 0.488 [0.467, 0.508]                              |
| 0.05                     | 0.484 [0.444, 0.528]                              |
| Scale parameter (h)      | Posterior Predictive Mean [90% Credible Interval] |
| 0.01                     | 0.489 [0.469, 0.505]                              |
| 0.025                    | 0.490 [0.453, 0.526]                              |
| 0.05                     | 0.493 [0.418, 0.578]                              |
| 0.1                      | 0.481 [0.294, 0.662]                              |

eTable 3 Preliminary Analysis and Prior Distribution for Multidimensional Example

| Parameter                   | Tested Values                       | Chosen Prior Distribution                       |
|-----------------------------|-------------------------------------|-------------------------------------------------|
| Weibull Shape               | Unif(1, 3)                          | Unif(1, 3)                                      |
| Weibull Intercept           | Unif(-20, 0)                        | $(-3.815 * \text{Shape}) - 1.963 + N(0, 0.608)$ |
| Gender coefficient          | Unif(-1.61, 0.7) [HR: Unif(0.2, 2)] | Unif(-1.61, 0.7)                                |
| Race coefficient<br>(black) | Unif(-1.61, 0.7) [HR: Unif(0.2, 2)] | Unif(-1.61, 0.7)                                |
| Race coefficient<br>(other) | Unif(-1.61, 0.7) [HR: Unif(0.2, 2)] | Unif(-1.61, 0.7)                                |

**Figure 1.** eFigure 1: Evolution of Sampled Parameters, ABC Rejection Sampler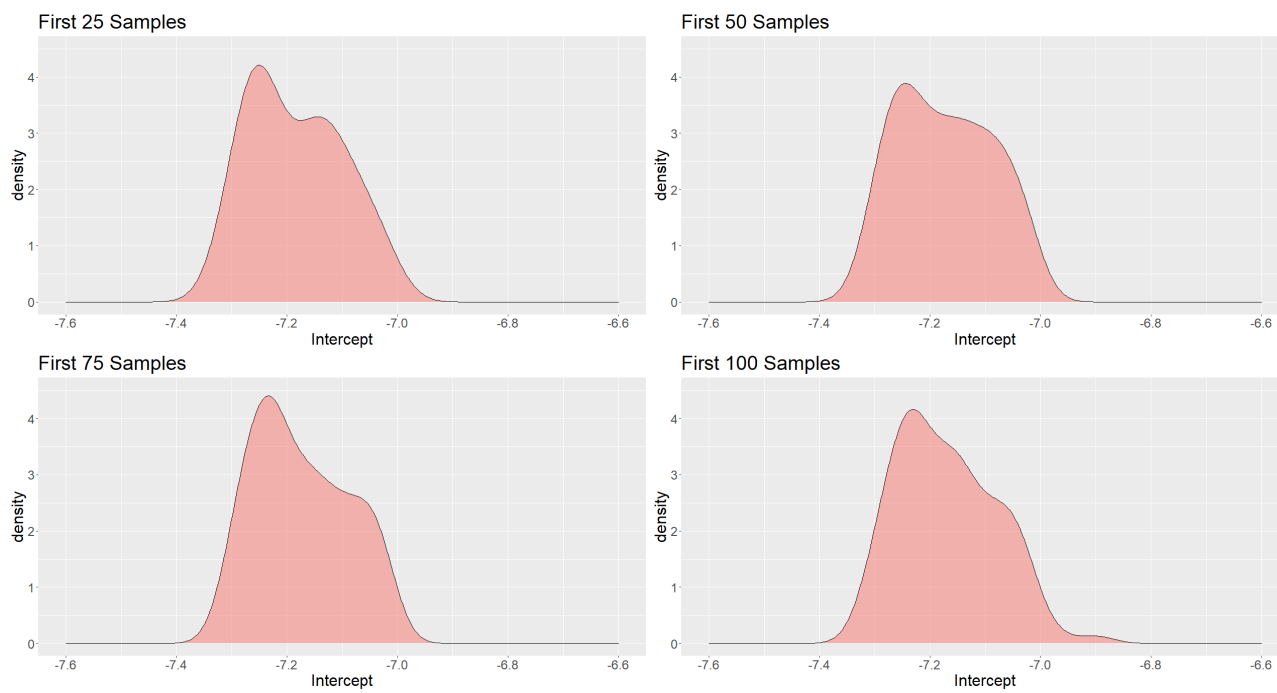

**Figure 2.** eFigure 2: Evolution of Sampled Parameters, ABC MCMC

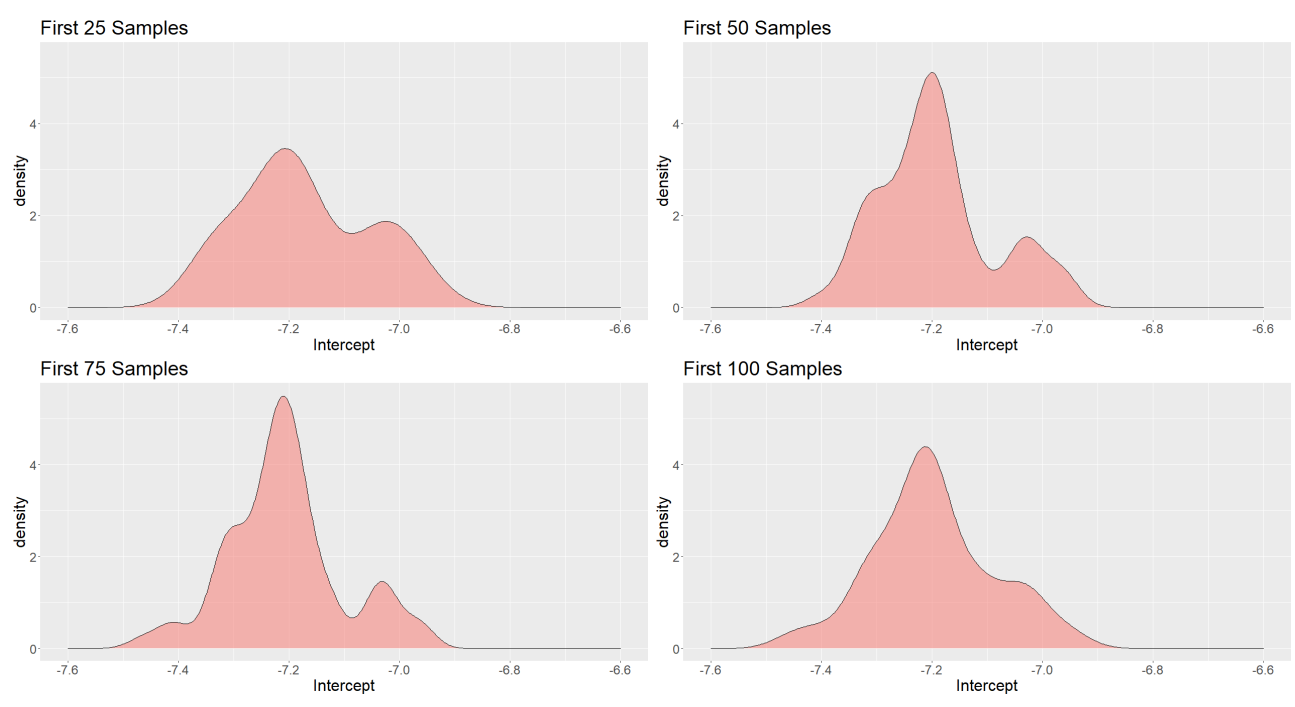

**Figure 3.** eFigure 3: Trace Plot of MCMC Chain, Single Target Example

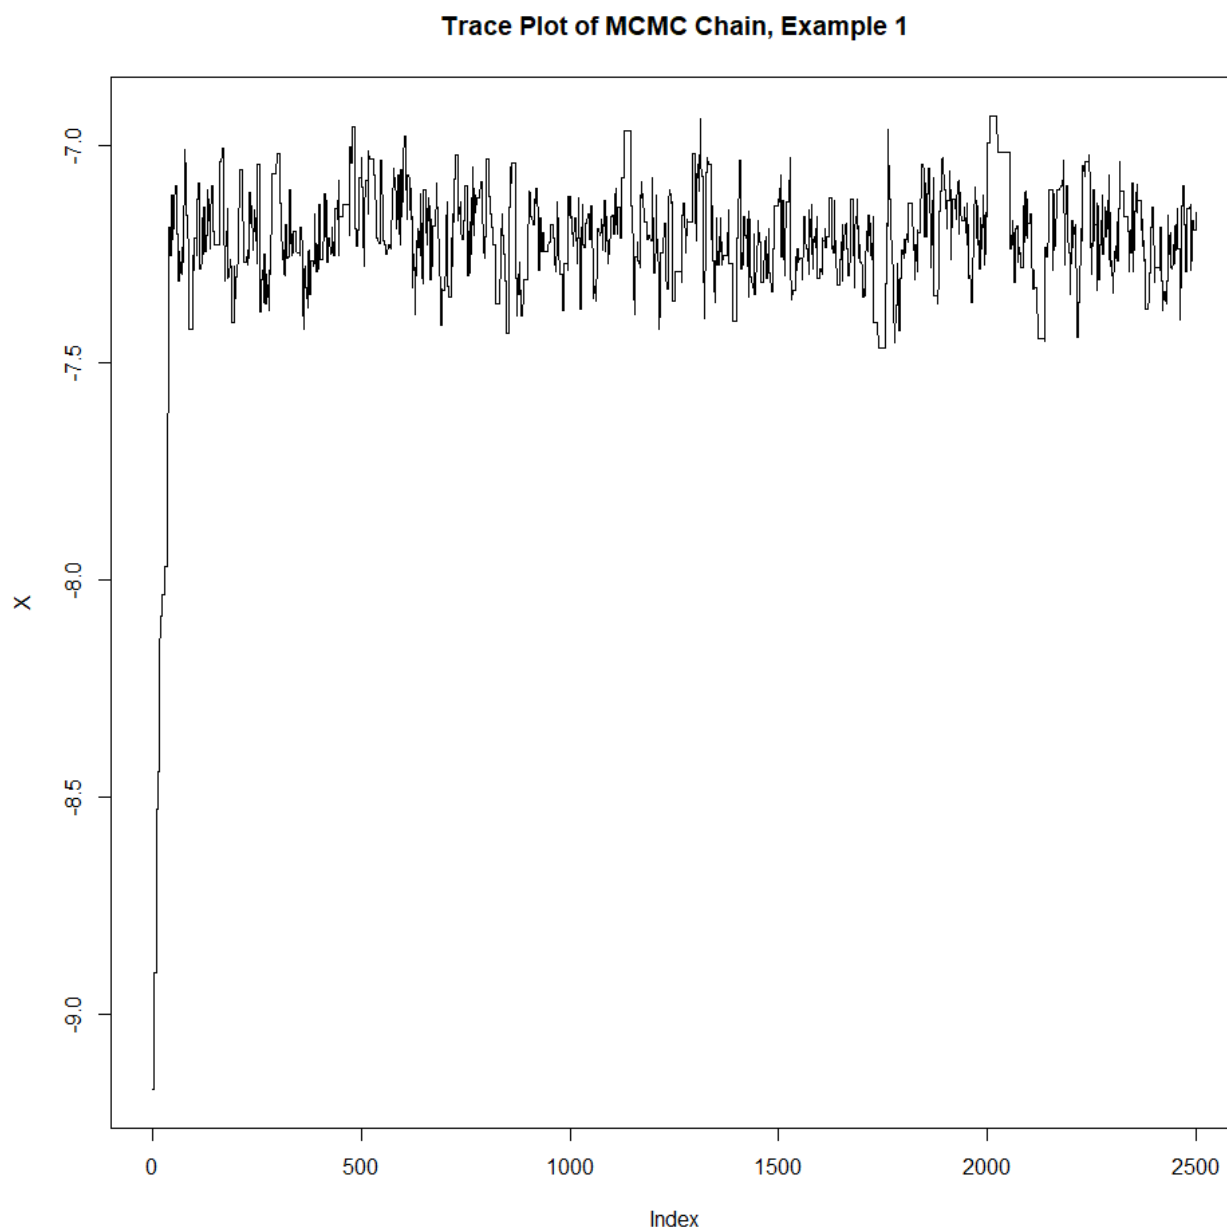

**Figure 4.** eFigure 4: Autocorrelation Plots for MCMC Chain, Single Target Example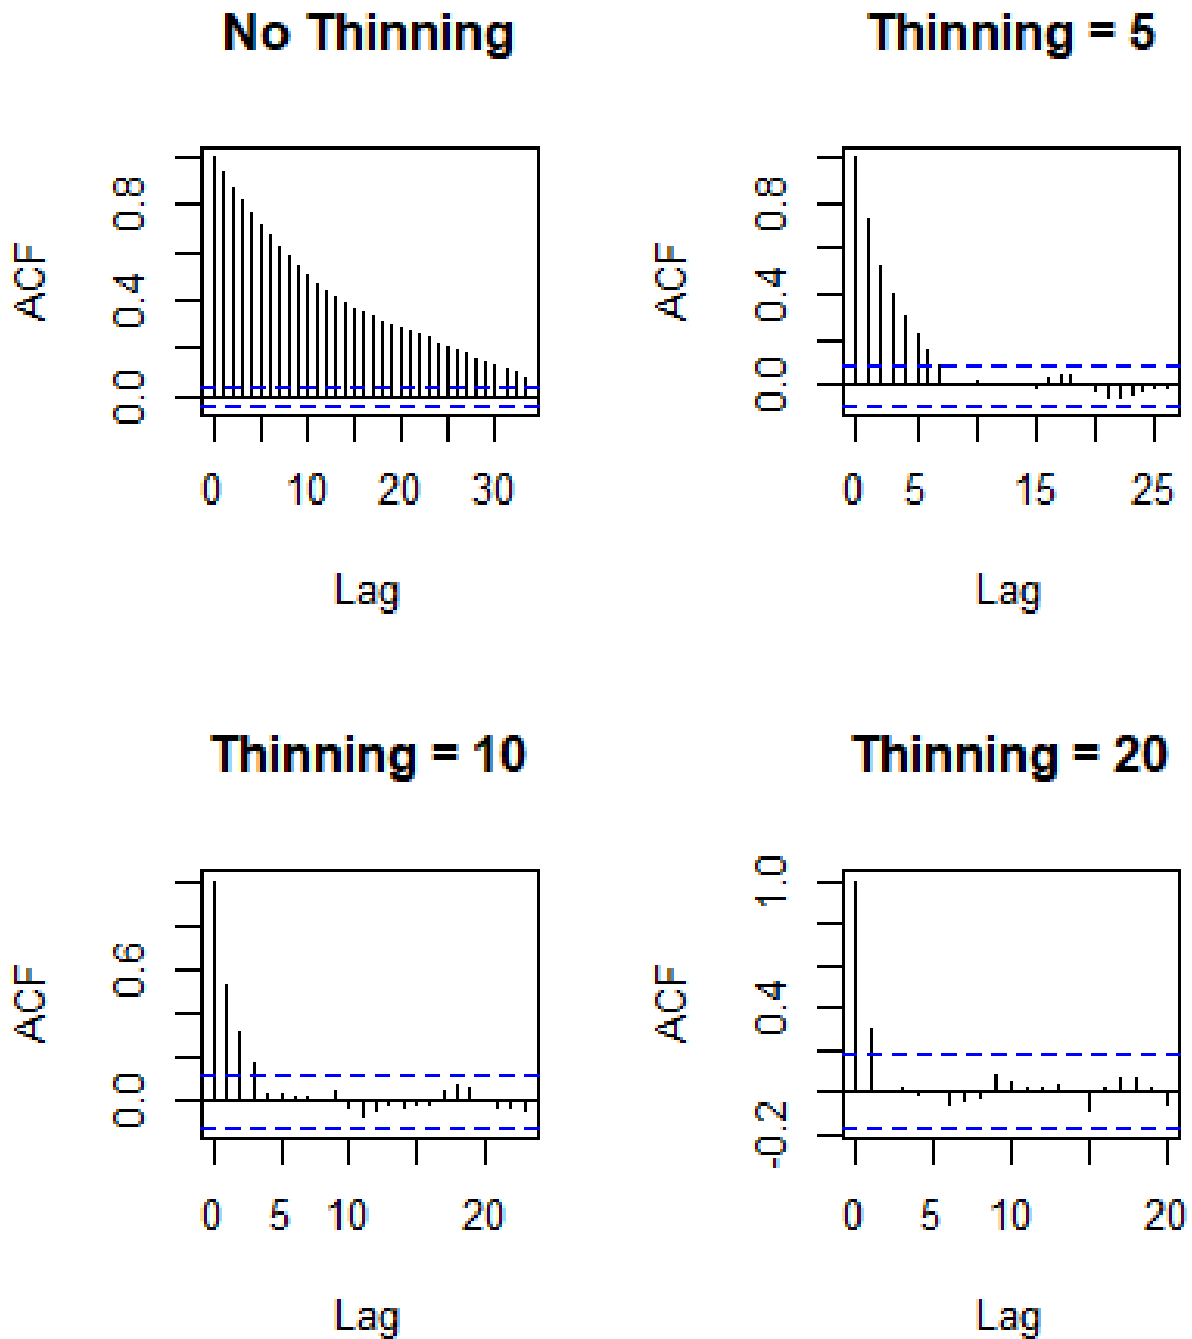

**Figure 5.** eFigure 5: Plot of Tested Parameters for Preliminary Analysis

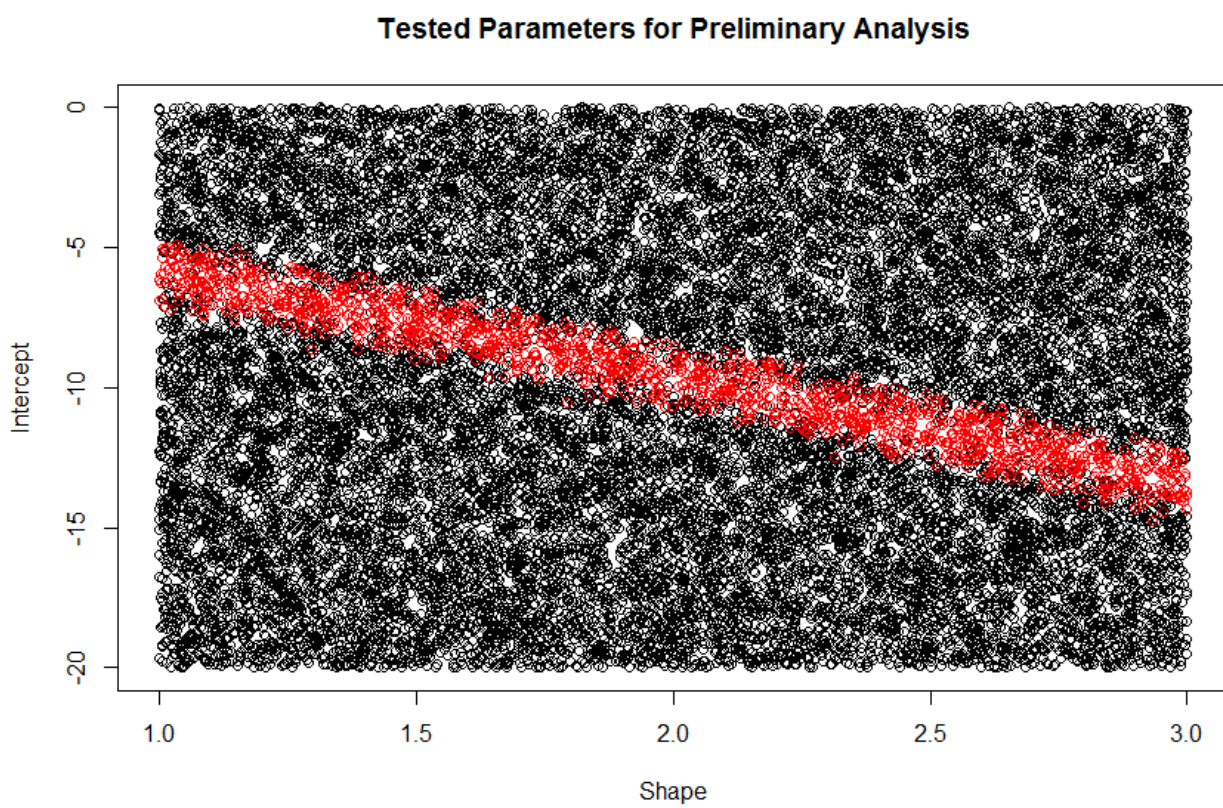

\*Points colored red represent parameters whose predictions were within 5 (using the RMSE distance function) of the calibration target.



**Figure 6.** eFigure 6: Approximate Posterior Distributions for Multidimensional Example, ABC Rejection Sampler

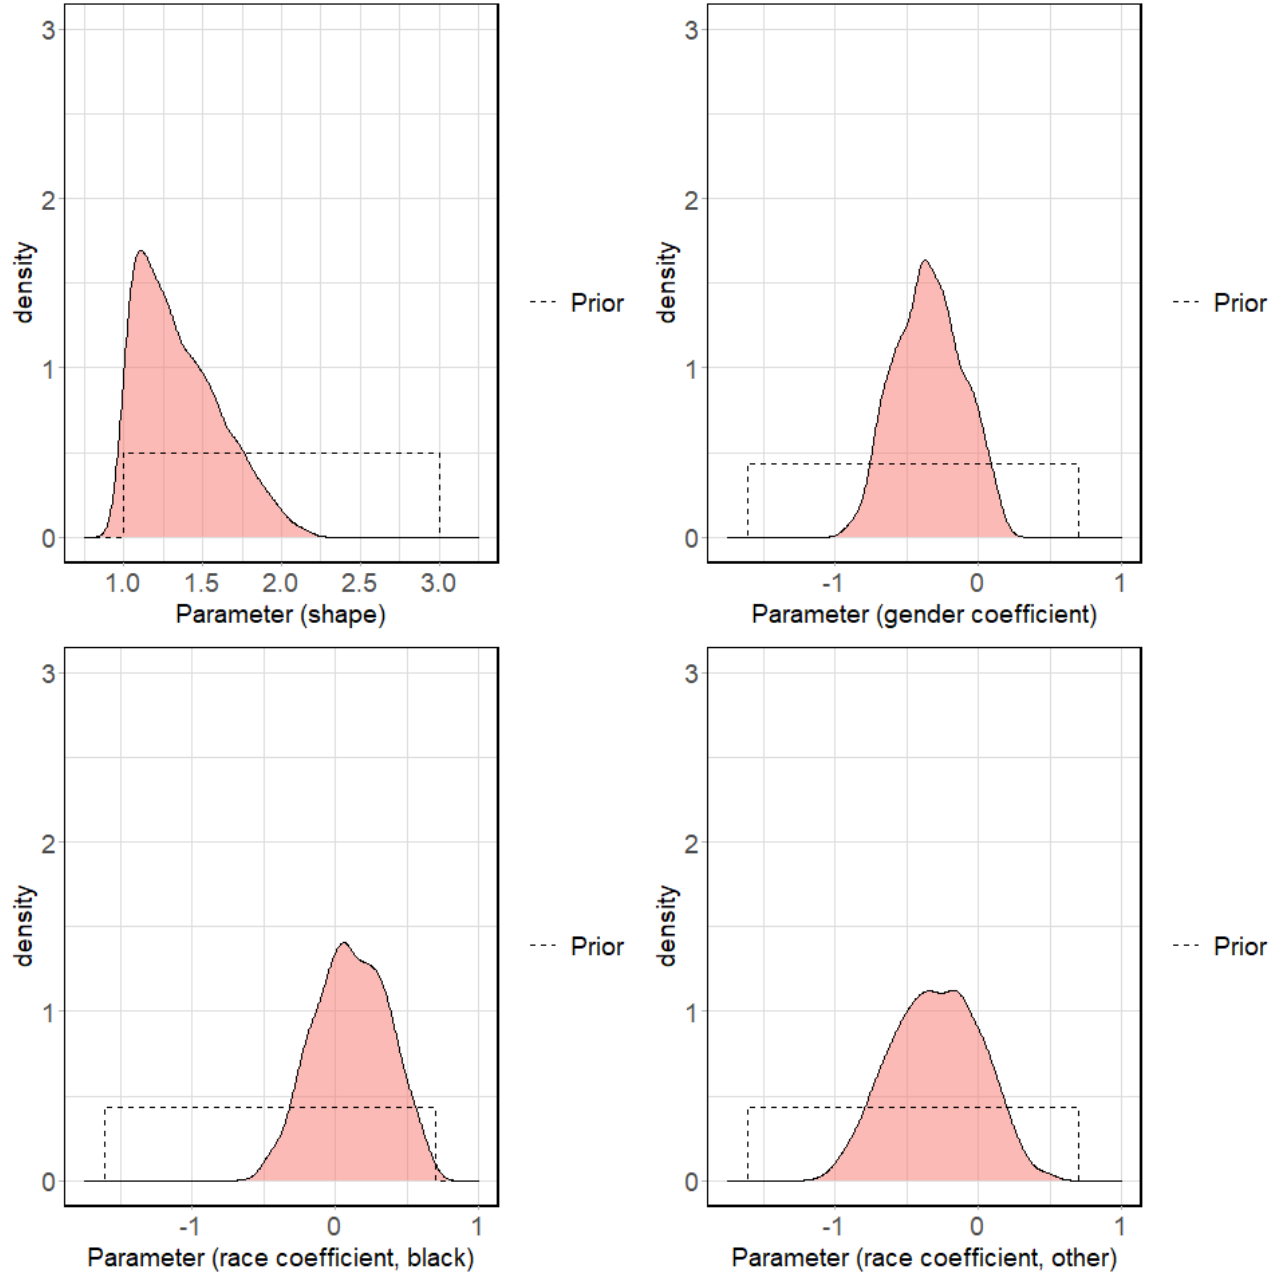

**Figure 7.** eFigure 7: Approximate Posterior Distributions for Multidimensional Example, ABC MCMC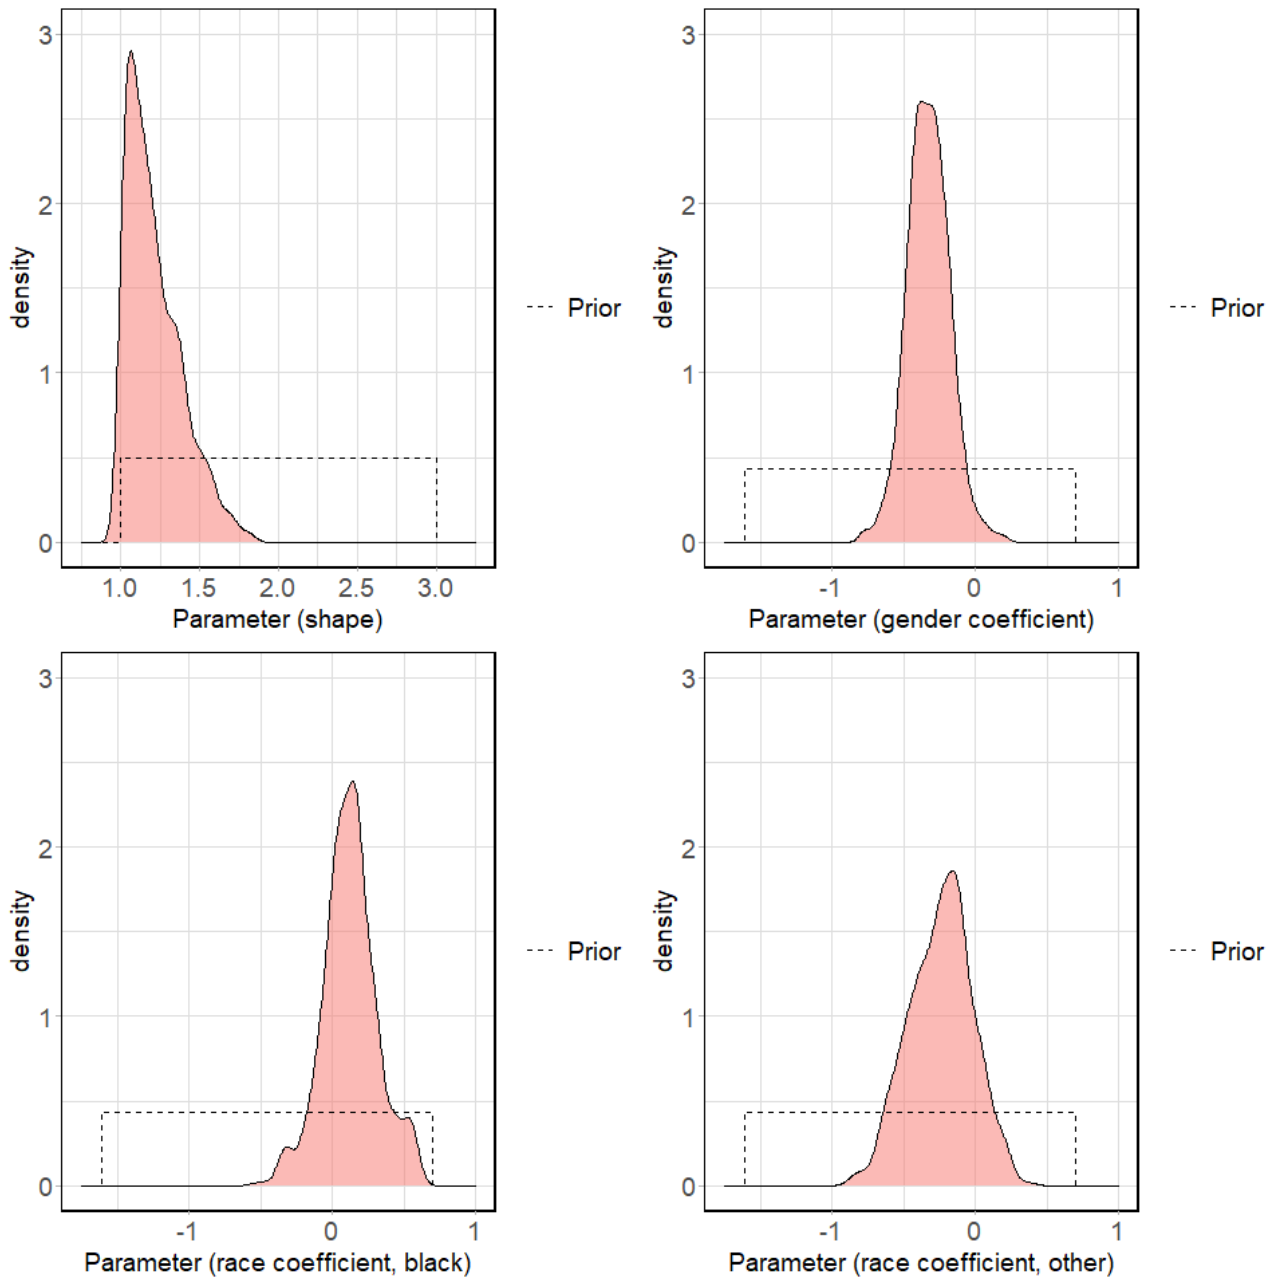

**Figure 8.** eFigure 8: Approximate Posterior Predictive Distributions for Multidimensional Example, ABC Rejection Sampler \*

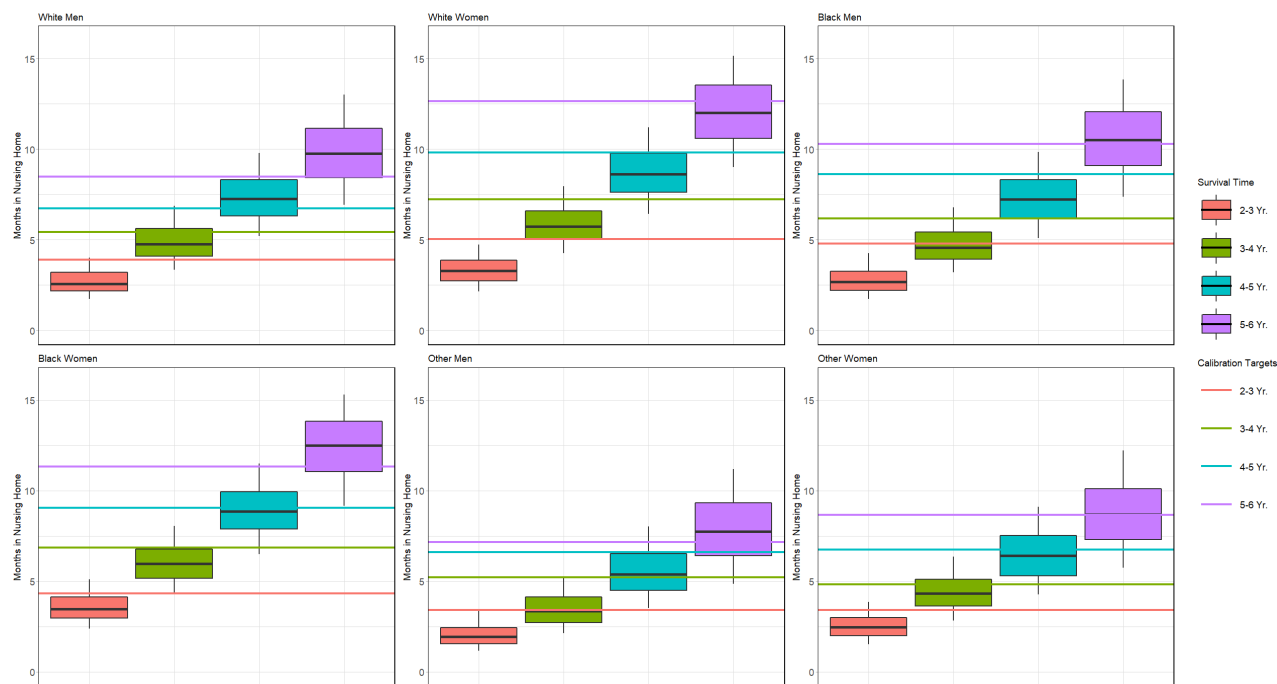

\* Boxplot whiskers represent the 90% credible interval for the distribution, instead of the common usage of 1.5 times the interquartile range.

**Figure 9.** eFigure 9: Approximate Posterior Predictive Distributions for Multidimensional Example, ABC MCMC \*

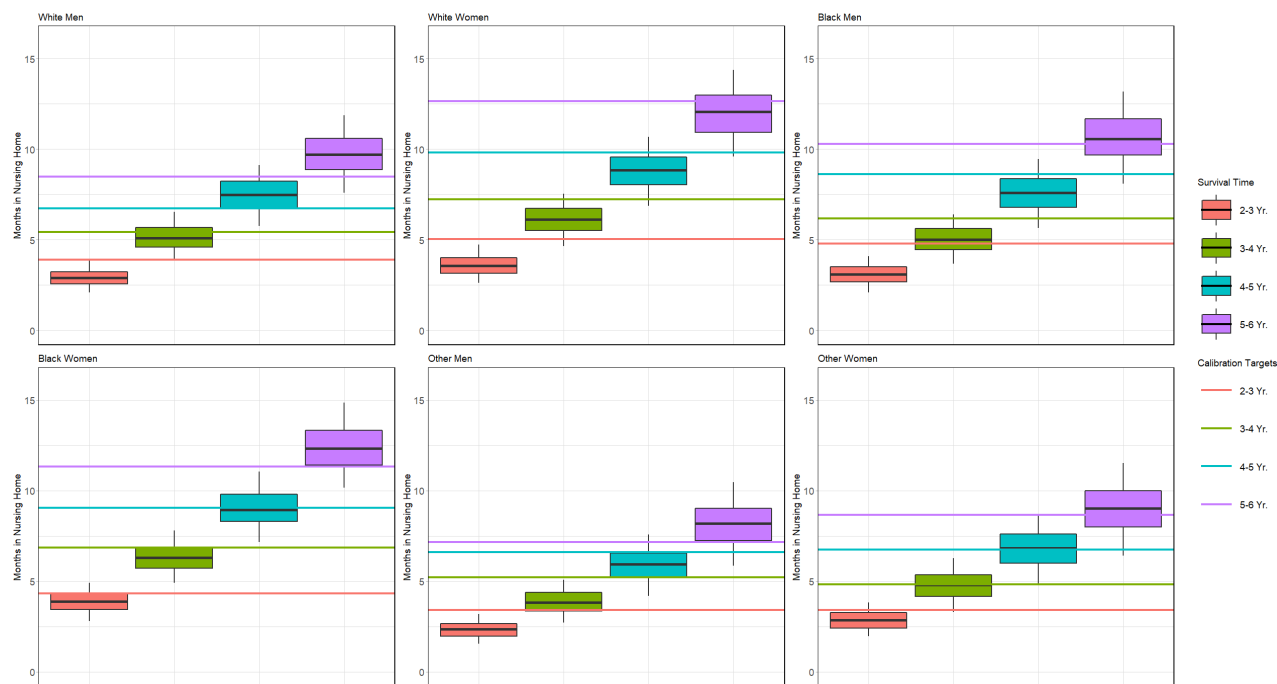

\* Boxplot whiskers represent the 90% credible interval for the distribution, instead of the common usage of 1.5 times the interquartile range.
